# Supplementary material for: An explainable machine learning-based phenomapping strategy for adaptive predictive enrichment in randomized controlled trials
Source: bioRxiv or medRxiv preprint supplement (doi:10.1101/2023.06.18.23291542), 2023-11-01
Supplement: Supplementary file [file media-1.pdf]

## EXTENDED DATA

## Extended Data tables

Extended Data Table S1. Power calculations and alpha spending adjustments for group sequential simulations.

|                                                                                                         | Interim analyses: |                 |                 | Final analysis |
|---------------------------------------------------------------------------------------------------------|-------------------|-----------------|-----------------|----------------|
|                                                                                                         | #1 (50 events)    | #2 (100 events) | #3 (150 events) |                |
| <b>IRIS</b>                                                                                             |                   |                 |                 |                |
| <i>O'Brien-Fleming</i>                                                                                  | 5.58, <0.0001     | 3.93, <0.0001   | 3.209, 0.0007   | 1.965, 0.0250  |
| <i>Pocock</i>                                                                                           | 2.402, 0.0082     | 2.402, 0.0142   | 2.402, 0.0188   | 2.402, 0.0250  |
| <i>Alpha-spending Pocock</i>                                                                            | 2.585, 0.0049     | 2.558, 0.0089   | 2.529, 0.0124   | 2.173, 0.0250  |
| <b>SPRINT</b>                                                                                           |                   |                 |                 |                |
| <i>O'Brien-Fleming</i>                                                                                  | 6.514, <0.0001    | 4.604, 0.0003   | 3.761, 0.0108   | 1.961, 0.0250  |
| <i>Pocock</i>                                                                                           | 2.410, 0.0080     | 2.410, 0.0139   | 2.410, 0.0184   | 2.410, 0.0250  |
| <i>Alpha-spending Pocock</i>                                                                            | 2.686, 0.0036     | 2.652, 0.0068   | 2.617, 0.0096   | 2.121, 0.0250  |
| Assumptions: alpha=0.025 (one-sided), beta=0.80                                                         |                   |                 |                 |                |
| <b>Values presented as efficacy boundary (<math>\alpha</math>-value scale), cumulative alpha spent.</b> |                   |                 |                 |                |
| IRIS: Insulin Resistance Intervention after Stroke; SPRINT: Systolic Blood Pressure Intervention Trial. |                   |                 |                 |                |

**Extended Data Table S2. Summary of baseline features included in IRIS.**

|                                                                                                                                                                                                                                                                                                                                                                                                                                                                                                                                                                                                                                                                                                                                                                                                                                                                                                                                                                                                                                                                                                                                                                                                                                                                                                                                                                               |                                                                                                                                                                                                                                                                                                                                                                                                                                                                                                                                                                                                                                                                                                                                                                                                                                                                                                                                                                                                                                                                                                                                                                                                                                                                                                     |
|-------------------------------------------------------------------------------------------------------------------------------------------------------------------------------------------------------------------------------------------------------------------------------------------------------------------------------------------------------------------------------------------------------------------------------------------------------------------------------------------------------------------------------------------------------------------------------------------------------------------------------------------------------------------------------------------------------------------------------------------------------------------------------------------------------------------------------------------------------------------------------------------------------------------------------------------------------------------------------------------------------------------------------------------------------------------------------------------------------------------------------------------------------------------------------------------------------------------------------------------------------------------------------------------------------------------------------------------------------------------------------|-----------------------------------------------------------------------------------------------------------------------------------------------------------------------------------------------------------------------------------------------------------------------------------------------------------------------------------------------------------------------------------------------------------------------------------------------------------------------------------------------------------------------------------------------------------------------------------------------------------------------------------------------------------------------------------------------------------------------------------------------------------------------------------------------------------------------------------------------------------------------------------------------------------------------------------------------------------------------------------------------------------------------------------------------------------------------------------------------------------------------------------------------------------------------------------------------------------------------------------------------------------------------------------------------------|
| <p>Age at time of blood test<br/>                 Modified Rankin grade<br/>                 Gender<br/>                 Ethnicity<br/>                 Race<br/>                 Waist-to-hip ratio<br/>                 Body mass index</p> <p>Prior history of stroke or transient ischemic attack<br/>                 History of diabetes<br/>                 Oral steroid use<br/>                 History of cancer<br/>                 History of liver disease<br/>                 History of lung disease<br/>                 History of kidney disease<br/>                 History of congestive heart failure<br/>                 NYHA class<br/>                 Carotid artery stenosis<br/>                 Atrial fibrillation<br/>                 Myocardial infarction history<br/>                 History of coronary artery bypass grafting surgery<br/>                 History of coronary angioplasty<br/>                 History of hypertension<br/>                 History of peripheral vascular disease<br/>                 History of hypercholesterolemia<br/>                 Smoking: ever<br/>                 Smoking: current<br/>                 Current alcohol use<br/>                 Lower extremity edema</p> <p>Ejection fraction (%)</p> <p>Systolic blood pressure<br/>                 Diastolic blood pressure</p> | <p>Medications:</p> <ul style="list-style-type: none"> <li>- Oral hypoglycemics</li> <li>- Thiazolidinediones</li> <li>- Insulin use</li> <li>- Non-insulin injectable agents</li> <li>- Oral steroids</li> <li>- ACEi (angiotensin-converting enzyme inhibitor) or ARB (angiotensin II-receptor blocker)</li> <li>- Beta-blockers</li> <li>- Calcium-channel blockers</li> <li>- Thiazide diuretics</li> <li>- Loop diuretics</li> <li>- Statins</li> <li>- Fibrates</li> <li>- Antiarrhythmics</li> <li>- Anticoagulants</li> <li>- Antidepressants</li> <li>- Sedatives and hypnotics</li> <li>- Hormone replacement</li> <li>- Antiplatelet therapy</li> <li>- Mineralocorticoid antagonists</li> <li>- Potassium-sparing diuretics</li> <li>- Use of any antihypertensive therapy</li> </ul> <p>Laboratory measurements:</p> <ul style="list-style-type: none"> <li>- Fasting glucose</li> <li>- HOMA: <i>Homeostatic Model Assessment for Insulin Resistance</i></li> <li>- Total cholesterol</li> <li>- High-density lipoprotein (HDL) levels</li> <li>- Low-density lipoprotein (LDL) levels</li> <li>- Triglycerides</li> <li>- Alanine transaminase (ALT) levels</li> <li>- Hemoglobin</li> <li>- C-reactive protein</li> <li>- Hemoglobin A1c</li> <li>- Bone density measure</li> </ul> |
|-------------------------------------------------------------------------------------------------------------------------------------------------------------------------------------------------------------------------------------------------------------------------------------------------------------------------------------------------------------------------------------------------------------------------------------------------------------------------------------------------------------------------------------------------------------------------------------------------------------------------------------------------------------------------------------------------------------------------------------------------------------------------------------------------------------------------------------------------------------------------------------------------------------------------------------------------------------------------------------------------------------------------------------------------------------------------------------------------------------------------------------------------------------------------------------------------------------------------------------------------------------------------------------------------------------------------------------------------------------------------------|-----------------------------------------------------------------------------------------------------------------------------------------------------------------------------------------------------------------------------------------------------------------------------------------------------------------------------------------------------------------------------------------------------------------------------------------------------------------------------------------------------------------------------------------------------------------------------------------------------------------------------------------------------------------------------------------------------------------------------------------------------------------------------------------------------------------------------------------------------------------------------------------------------------------------------------------------------------------------------------------------------------------------------------------------------------------------------------------------------------------------------------------------------------------------------------------------------------------------------------------------------------------------------------------------------|

**Extended Data Table S3. Summary of baseline features included in SPRINT.**

|                                                               |                                                         |
|---------------------------------------------------------------|---------------------------------------------------------|
| Age                                                           | Patient-reported history of heart attack                |
| Female sex                                                    | Patient-reported history of irregular heartbeat         |
| Race (White, Black, Hispanic, Other)                          | Patient-reported history of osteoarthritis              |
| Smoking                                                       | Patient-reported history of rheumatoid arthritis        |
| History of cardiovascular disease                             | Patient-reported history of gout                        |
| History of chronic kidney disease                             | Patient-reported history of other arthritis             |
| History of myocardial infarction                              | Patient-reported history of hip problems                |
| History of coronary revascularization                         | Patient-reported history of cancer                      |
| Atrial fibrillation/flutter                                   | Patient-reported history of skin cancer                 |
| History of angina                                             | Patient-reported history of peripheral vascular disease |
| Family history of cardiovascular disease                      | Patient-reported history of thyroid disease             |
| Family history of premature cardiovascular disease            | Patient-reported history of anemia                      |
| Days per week of vigorous activity                            | Patient-reported history of hypertension                |
| Patients reports fainting when standing                       | Patient-reported history of low back pain               |
| Left ventricular hypertrophy by electrocardiography           |                                                         |
| Body mass index                                               |                                                         |
|                                                               | Use of blood pressure medications at baseline           |
| Standing systolic blood pressure                              | Number of blood pressure medications                    |
| Standing diastolic blood pressure                             | Aspirin use                                             |
| Standing heart rate                                           | Statin use                                              |
| Seating systolic blood pressure                               |                                                         |
| Seating diastolic blood pressure                              | Creatinine (serum)                                      |
| Seating heart rate                                            | Total cholesterol (serum)                               |
| Change in systolic blood pressure when standing               | Blood urea nitrogen (serum)                             |
| Change in diastolic blood pressure when standing              | Chloride (serum)                                        |
| Change in heart rate when standing                            | Bicarbonate (serum)                                     |
|                                                               | Creatinine (urine)                                      |
| Montreal Cognitive Assessment (MOCA) score                    | Fasting glucose (serum)                                 |
| Digit symbol substitution test score                          | High-density lipoprotein (serum)                        |
|                                                               | Potassium (serum)                                       |
| Acute coronary syndrome                                       | Low-density lipoprotein (serum)                         |
| Carotid disease                                               | Sodium (serum)                                          |
| Peripheral arterial disease revascularisation                 | Triglycerides (serum)                                   |
| Known 50% or greater coronary, carotid, peripheral stenosis * | Microalbumin (urine)                                    |
| Abdominal aortic aneurysm 5 cm or greater or repaired         | Urine microalbumin/creatinine ratio                     |
| Calcium score 400 or greater                                  | Glomerular filtration rate                              |
| Ankle-brachial index 0.9 or lower                             |                                                         |
| Unable to stand                                               | QRS duration                                            |
| Congestive heart failure                                      | Cornell Voltage Product                                 |
| Seizure                                                       | Cornell Voltage                                         |
| Stroke                                                        | Sokolow-Lyon index                                      |
| Transient ischemic attack                                     | Atrial fibrillation or flutter on electrocardiography   |
| Diabetes                                                      |                                                         |
| Alcohol use disorder                                          | Framingham risk score                                   |
| Dizziness                                                     | Subjective assessment of general state of health        |

Extended Data Table S4. Baseline characteristics for the final population across five simulation runs in IRIS.

|                                      | Simulations   |               |               |               |               | Original      | p-value |
|--------------------------------------|---------------|---------------|---------------|---------------|---------------|---------------|---------|
|                                      | #1            | #2            | #3            | #4            | #5            |               |         |
| Final number                         | 2465          | 3512          | 3240          | 3298          | 3298          | 3876          |         |
| Pioglitazone arm                     | 1236 (50.1)   | 1759 (50.1)   | 1631 (50.3)   | 1655 (50.2)   | 1642 (49.8)   | 1939 (50.0)   | 0.999   |
| Age                                  | 63.0 (10.4)   | 62.9 (10.6)   | 63.1 (10.5)   | 63.1 (10.5)   | 63.1 (10.5)   | 62.9 (10.6)   | 0.935   |
| Female sex                           | 877 (35.6)    | 1203 (34.3)   | 1160 (35.8)   | 1178 (35.7)   | 1186 (36.0)   | 1338 (34.5)   | 0.545   |
| Asian race                           | 27 (1.1)      | 36 (1.0)      | 33 (1.0)      | 32 (1.0)      | 31 (1.0)      | 42 (1.1)      | 1.000   |
| Black race                           | 273 (11.3)    | 374 (10.8)    | 346 (10.9)    | 335 (10.3)    | 343 (10.6)    | 419 (11.0)    |         |
| White race                           | 2086 (86.2)   | 2988 (86.6)   | 2759 (86.7)   | 2826 (87.2)   | 2819 (87.0)   | 3291 (86.4)   |         |
| Hispanic ethnicity                   | 91 (3.7)      | 132 (3.8)     | 117 (3.6)     | 121 (3.7)     | 122 (3.7)     | 147 (3.8)     | 0.999   |
| Prior history of stroke or TIA       | 379 (15.5)    | 583 (16.7)    | 555 (17.2)    | 567 (17.3)    | 589 (18.0)    | 643 (16.7)    | 0.216   |
| Hypertension                         | 1840 (75.1)   | 2433 (69.7)   | 2328 (72.3)   | 2367 (72.1)   | 2376 (72.4)   | 2770 (71.9)   | 0.001   |
| Atrial fibrillation                  | 167 (6.8)     | 240 (6.9)     | 227 (7.1)     | 236 (7.2)     | 239 (7.3)     | 264 (6.9)     | 0.966   |
| Myocardial infarction                | 213 (8.7)     | 300 (8.6)     | 274 (8.5)     | 285 (8.7)     | 289 (8.8)     | 324 (8.4)     | 0.993   |
| Smoking (ever)                       | 1657 (67.2)   | 2338 (66.6)   | 2196 (67.8)   | 2200 (66.8)   | 2199 (66.7)   | 2564 (66.2)   | 0.784   |
| Hypercholesterolemia                 | 1882 (77.2)   | 2336 (67.2)   | 2259 (70.4)   | 2268 (69.5)   | 2276 (69.7)   | 2618 (68.2)   | <0.001  |
| Body mass index (kg/m <sup>2</sup> ) | 29.8 (5.5)    | 29.8 (5.4)    | 29.8 (5.4)    | 29.8 (5.4)    | 29.9 (5.4)    | 29.9 (5.4)    | 0.965   |
| Systolic blood pressure (mmHg)       | 133.3 (17.4)  | 133.0 (17.2)  | 133.1 (17.3)  | 133.2 (17.5)  | 133.3 (17.4)  | 133.2 (17.5)  | 0.985   |
| Diastolic blood pressure (mmHg)      | 79.1 (10.7)   | 79.2 (10.6)   | 79.2 (10.6)   | 79.2 (10.7)   | 79.2 (10.6)   | 79.2 (10.6)   | 0.999   |
| Modified Rankin scale                | 1.0 [0.0,2.0] | 1.0 [0.0,2.0] | 1.0 [0.0,2.0] | 1.0 [0.0,2.0] | 1.0 [0.0,2.0] | 1.0 [0.0,2.0] | 0.999   |
| HOMA                                 | 5.4 (2.9)     | 5.5 (3.1)     | 5.6 (3.1)     | 5.5 (3.1)     | 5.5 (3.1)     | 5.5 (3.0)     | 0.599   |
| LDL (mg/dL)                          | 87.6 (31.8)   | 87.2 (31.4)   | 87.0 (31.4)   | 86.7 (31.3)   | 86.9 (31.4)   | 87.7 (31.5)   | 0.751   |
| HDL (mg/dL)                          | 47.0 (12.9)   | 47.3 (12.7)   | 47.6 (12.9)   | 47.5 (12.9)   | 47.6 (12.8)   | 47.0 (12.7)   | 0.191   |
| Triglycerides (mg/dL)                | 142.7 (73.0)  | 139.9 (72.3)  | 139.8 (71.7)  | 140.3 (73.0)  | 140.0 (72.4)  | 141.0 (72.7)  | 0.696   |
| Antihypertensive therapy             | 2040 (82.8)   | 2736 (77.9)   | 2579 (79.6)   | 2652 (80.4)   | 2657 (80.6)   | 3080 (79.5)   | <0.001  |
| Statin therapy                       | 2062 (84.0)   | 2888 (82.5)   | 2701 (83.7)   | 2753 (83.8)   | 2738 (83.3)   | 3186 (82.5)   | 0.407   |
| Antiplatelet agents                  | 2274 (92.3)   | 3220 (91.7)   | 2976 (91.9)   | 3028 (91.9)   | 3023 (91.7)   | 3557 (91.8)   | 0.978   |
| Anticoagulation                      | 272 (11.1)    | 398 (11.4)    | 361 (11.2)    | 375 (11.4)    | 378 (11.5)    | 441 (11.4)    | 0.996   |
| ACEi or ARB                          | 1529 (62.1)   | 1857 (52.9)   | 1837 (56.7)   | 1908 (57.9)   | 1894 (57.5)   | 2154 (55.6)   | <0.001  |
| Beta-blockers                        | 772 (31.4)    | 1095 (31.3)   | 991 (30.7)    | 1047 (31.9)   | 1053 (32.0)   | 1228 (31.8)   | 0.873   |

ACEi: Angiotensin-converting enzyme inhibitors; ARB: Angiotensin receptor blockers; HDL: High-density lipoprotein; HOMA: Homeostatic Model Assessment for Insulin Resistance; LDL: Low-density lipoprotein; TIA: transient ischemic attack. Continuous variables are summarized as mean (standard deviation) or median [25<sup>th</sup>-75<sup>th</sup> percentile], categorical variables as counts (valid percentages).

Extended Data Table S5. Baseline characteristics for the final population across five simulation runs in SPRINT.

|                                        | Simulations        |                    |                    |                    |                    | Original           | p-value      |
|----------------------------------------|--------------------|--------------------|--------------------|--------------------|--------------------|--------------------|--------------|
|                                        | #1                 | #2                 | #3                 | #4                 | #5                 |                    |              |
| <b>Total number</b>                    | <b>6844</b>        | <b>7854</b>        | <b>5896</b>        | <b>6844</b>        | <b>6525</b>        | <b>9361</b>        |              |
| <b>Intensive arm</b>                   | <b>3485 (50.9)</b> | <b>3893 (49.6)</b> | <b>2926 (49.6)</b> | <b>3485 (50.9)</b> | <b>3222 (49.4)</b> | <b>4678 (50.0)</b> | <b>0.261</b> |
| <b>Age</b>                             | 68.2 (9.4)         | 67.8 (9.4)         | 67.8 (9.4)         | 68.2 (9.4)         | 67.6 (9.4)         | 67.9 (9.4)         | 0.006        |
| <b>Female sex</b>                      | 2297 (33.6)        | 2861 (36.4)        | 2224 (37.7)        | 2297 (33.6)        | 2098 (32.2)        | 3332 (35.6)        | <0.001       |
| <i>Non-Hispanic Black</i>              | 1967 (28.7)        | 2383 (30.3)        | 1924 (32.6)        | 1967 (28.7)        | 2000 (30.7)        | 2802 (29.9)        | <0.001       |
| <i>Hispanic</i>                        | 721 (10.5)         | 851 (10.8)         | 630 (10.7)         | 721 (10.5)         | 634 (9.7)          | 984 (10.5)         |              |
| <i>Non-Hispanic White</i>              | 4016 (58.7)        | 4467 (56.9)        | 3223 (54.7)        | 4016 (58.7)        | 3752 (57.5)        | 5399 (57.7)        |              |
| <b>BMI (kg/m<sup>2</sup>)</b>          | 29.8 (5.7)         | 29.8 (5.8)         | 29.9 (5.8)         | 29.8 (5.7)         | 29.9 (5.7)         | 29.8 (5.8)         | 0.970        |
| <b>Blood pressure medications</b>      |                    |                    |                    |                    |                    |                    |              |
| <i>Former</i>                          | 3138 (45.9)        | 3321 (42.3)        | 2312 (39.2)        | 3138 (45.9)        | 2646 (40.6)        | 3983 (42.5)        | <0.001       |
| <i>Active</i>                          | 797 (11.6)         | 1060 (13.5)        | 720 (12.2)         | 797 (11.6)         | 841 (12.9)         | 1242 (13.3)        |              |
| <b>Aspirin use</b>                     | 3917 (57.2)        | 3925 (50.0)        | 2971 (50.4)        | 3917 (57.2)        | 3278 (50.2)        | 4772 (51.0)        | <0.001       |
| <b>Statin use</b>                      | 3372 (49.3)        | 3402 (43.3)        | 2491 (42.2)        | 3372 (49.3)        | 2807 (43.0)        | 4080 (43.6)        | <0.001       |
| <b>Cardiovascular disease</b>          | 1693 (24.7)        | 1621 (20.6)        | 1070 (18.1)        | 1693 (24.7)        | 966 (14.8)         | 1877 (20.1)        | <0.001       |
| <b>Chronic kidney disease</b>          | 1758 (25.7)        | 2054 (26.2)        | 1541 (26.1)        | 1758 (25.7)        | 1582 (24.2)        | 2646 (28.3)        | <0.001       |
| <b>Myocardial infarction</b>           | 606 (8.9)          | 578 (7.4)          | 370 (6.3)          | 606 (8.9)          | 339 (5.2)          | 666 (7.1)          | <0.001       |
| <b>Coronary revascularization</b>      | 806 (11.8)         | 753 (9.6)          | 457 (7.8)          | 806 (11.8)         | 431 (6.6)          | 878 (9.4)          | <0.001       |
| <b>Peripheral vascular disease</b>     | 414 (6.0)          | 415 (5.3)          | 296 (5.0)          | 414 (6.0)          | 304 (4.7)          | 503 (5.4)          | 0.001        |
| <b>Carotid artery disease</b>          | 271 (4.0)          | 253 (3.2)          | 160 (2.7)          | 271 (4.0)          | 154 (2.4)          | 298 (3.2)          | <0.001       |
| <b>Framingham risk score</b>           | 17.3 (2.5)         | 17.4 (2.5)         | 17.3 (2.5)         | 17.3 (2.5)         | 17.4 (2.5)         | 17.4 (2.5)         | 0.868        |
| <b>Atrial fibrillation</b>             | 566 (8.3)          | 611 (7.8)          | 503 (8.5)          | 566 (8.3)          | 490 (7.5)          | 754 (8.1)          | 0.298        |
| <b>Congestive heart failure</b>        | 252 (3.7)          | 274 (3.5)          | 212 (3.6)          | 252 (3.7)          | 209 (3.2)          | 326 (3.5)          | 0.677        |
| <b>Family history</b>                  | 4247 (62.1)        | 4903 (62.4)        | 3723 (63.1)        | 4247 (62.1)        | 3994 (61.2)        | 6028 (64.4)        | 0.001        |
| <b>SBP (mmHg)</b>                      | 139.6 (15.7)       | 139.6 (15.5)       | 139.7 (15.6)       | 139.6 (15.7)       | 139.8 (15.5)       | 139.7 (15.6)       | 0.968        |
| <b>DBP (mmHg)</b>                      | 77.8 (11.9)        | 78.2 (11.9)        | 78.3 (11.9)        | 77.8 (11.9)        | 78.6 (11.8)        | 78.1 (11.9)        | 0.001        |
| <b>Resting heart rate (bpm)</b>        | 65.9 (11.5)        | 66.4 (11.6)        | 66.3 (11.5)        | 65.9 (11.5)        | 66.4 (11.6)        | 66.3 (11.6)        | 0.019        |
| <b>Total cholesterol (mg/dL)</b>       | 188.2 (41.1)       | 190.3 (41.2)       | 191.2 (40.6)       | 188.2 (41.1)       | 190.5 (40.0)       | 190.1 (41.1)       | <0.001       |
| <b>HDL (mg/dL)</b>                     | 52.6 (14.0)        | 53.0 (14.5)        | 53.2 (14.6)        | 52.6 (14.0)        | 52.8 (14.1)        | 52.9 (14.4)        | 0.054        |
| <b>LDL (mg/dL)</b>                     | 111.1 (34.9)       | 112.6 (35.1)       | 113.5 (34.8)       | 111.1 (34.9)       | 113.2 (34.1)       | 112.6 (35.1)       | <0.001       |
| <b>eGFR (mL/min/1.73m<sup>2</sup>)</b> | 72.5 (20.3)        | 72.6 (20.3)        | 72.5 (20.4)        | 72.5 (20.3)        | 73.3 (20.2)        | 71.8 (20.6)        | 0.001        |

BMI: body mass index; DBP: diastolic blood pressure; eGFR: estimated glomerular filtration rate; HDL: High-density lipoprotein; LDL: Low-density lipoprotein; SBP: systolic blood pressure. Continuous variables are summarized as mean (standard deviation) or median [25<sup>th</sup>-75<sup>th</sup> percentile], categorical variables as counts (valid percentages).

## Extended Data figures

### Example of model evolution during one simulation in IRIS

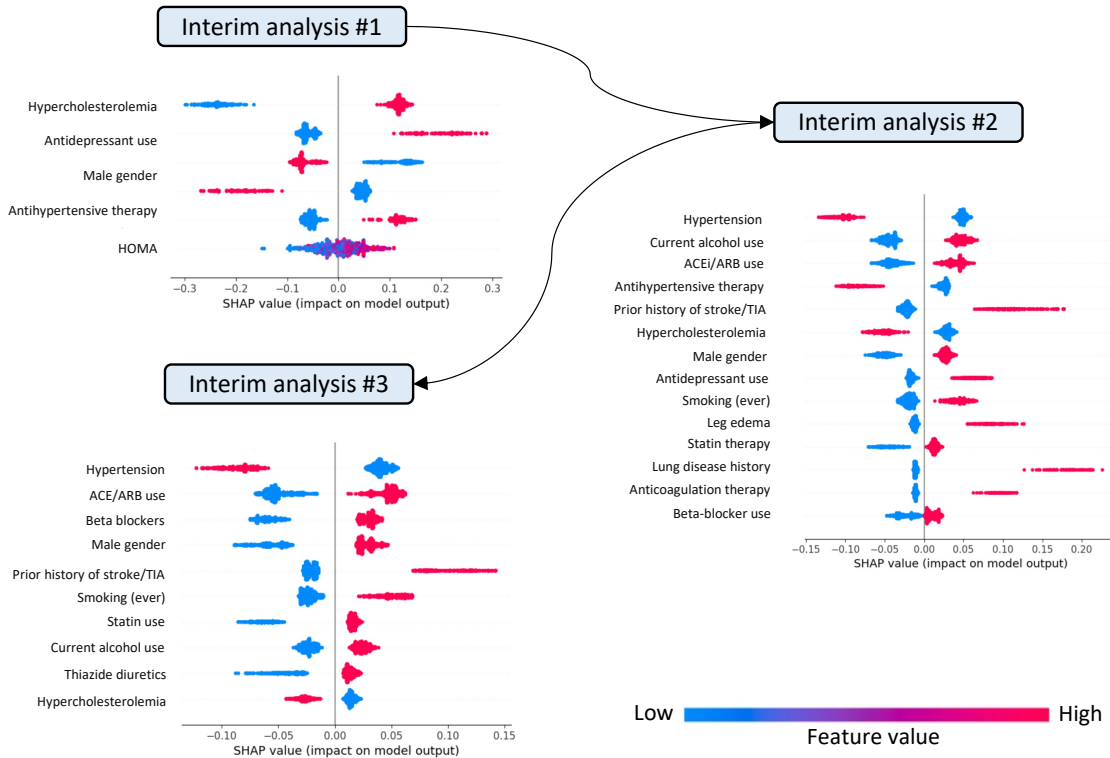

**Extended Data Fig. S1 | Example of model evolution for prediction of the personalized cardiovascular benefit of pioglitazone versus placebo across different enrollment periods.** The panels show the SHAP (Shapley additive explanations) plot summary for the final epoch model using the features identified as important by the Boruta method. Negative SHAP values favor the intensive systolic blood pressure reduction. IRIS: Insulin Resistance Intervention after Stroke.

Example of model evolution during one simulation in SPRINT

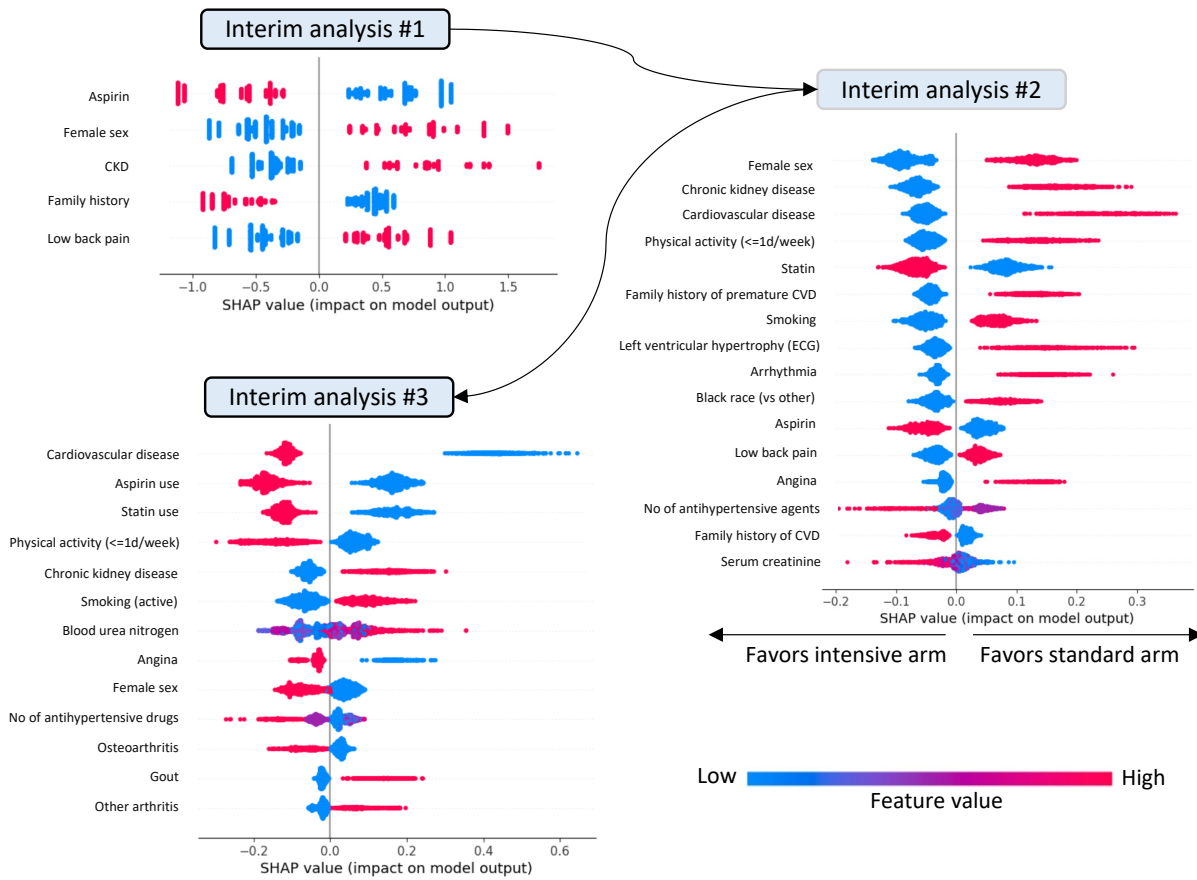

**Extended Data Fig. S2 | Example of model evolution for prediction of the personalized cardiovascular benefit of intensive versus standard systolic blood pressure reduction across different enrollment periods.** The panels show the SHAP (Shapley additive explanations) plot summary for the final epoch model using the features identified as important by the Boruta method. Negative SHAP values favor the intensive systolic blood pressure reduction. SPRINT: Systolic Blood Pressure Intervention Trial.

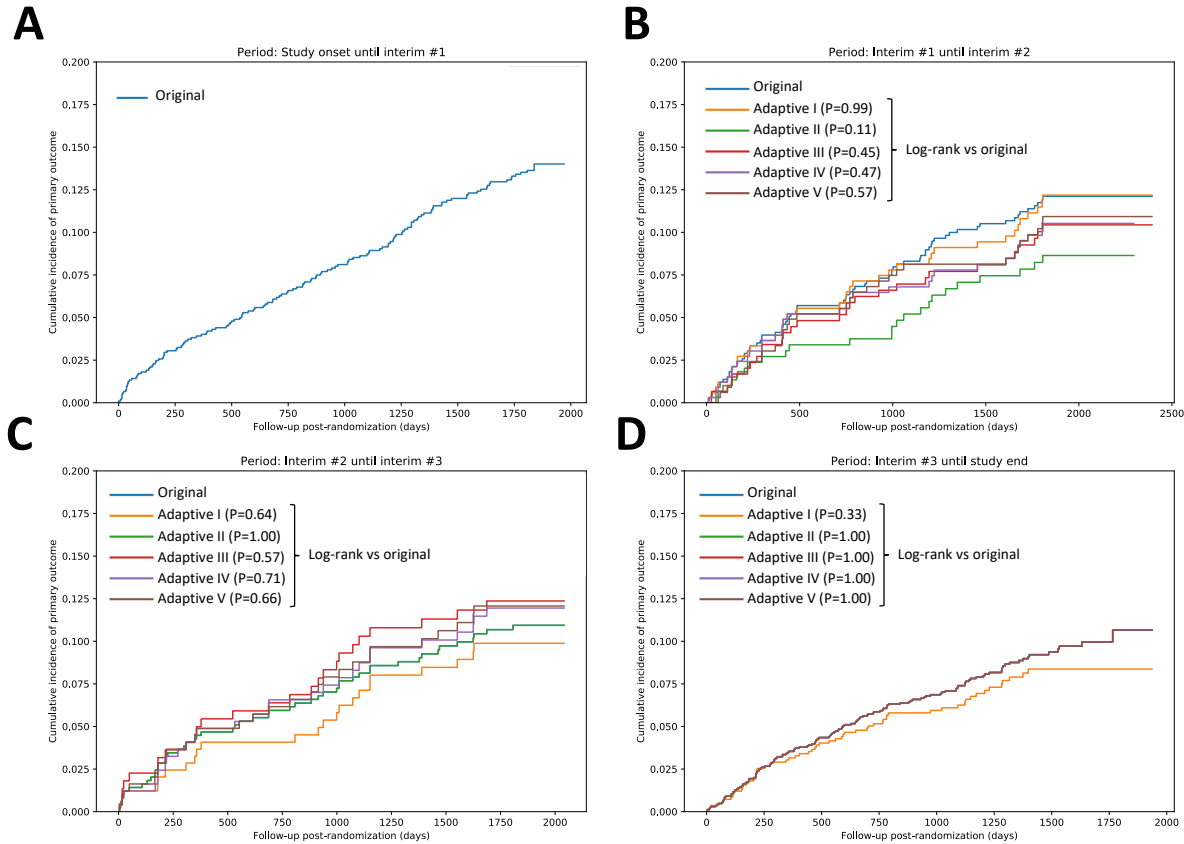

**Extended Data Fig. S3 | Incidence of the primary outcome across different enrollment periods in IRIS.** Incidence of the primary outcome among patients recruited: **(A)** prior to the first interim analysis, **(B)** between the first and second interim timepoints, **(C)** second and third timepoints, and **(D)** after the third interim analysis timepoint. Each analysis includes distinct curves for each one of the adaptive simulations. Here,  $p$ -values are derived from paired log-rank comparisons with the original trial survival curve. IRIS: Insulin Resistance Intervention after Stroke.



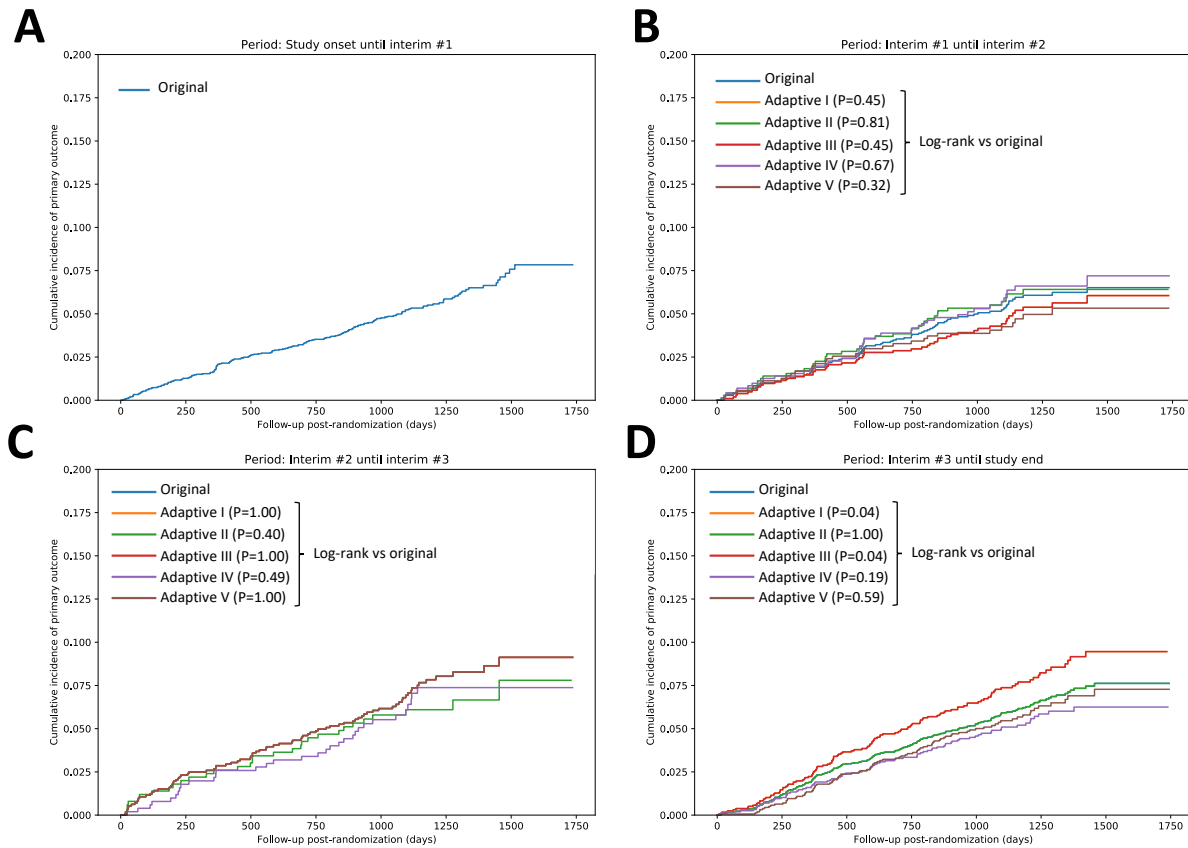

**Extended Data Fig. S4 | Incidence of the primary outcome across different enrollment periods in SPRINT.** Incidence of the primary outcome among patients recruited: (A) prior to the first interim analysis, (B) between the first and second interim timepoints, (C) second and third timepoints, and (D) after the third interim analysis timepoint. Each analysis includes distinct curves for each one of the adaptive simulations. Here,  $p$ -values are derived from paired log-rank comparisons with the original trial survival curve. SPRINT: Systolic Blood Pressure Intervention Trial.
